# Supplementary material for: An A′–A–D–A–A′ type small molecule based on 2,7-carbazole for solution-processed organic solar cells with high open-circuit voltage
Source: Royal Society of Chemistry journal article supplement (doi:10.1039/c3ra43958e), 2013-01-01
Supplement: c3ra43958e.pdf [file c3ra43958e.pdf]

Electronic Supplementary Information for:

## A'-A-D-A-A' type small molecule based on 2,7-Carbazole for solution-processed organic solar cells with high open-circuit voltage

Pengcheng Li,<sup>a,b</sup> Hui Tong,<sup>\*a</sup> Jian Liu,<sup>a, b</sup> Junqiao Ding,<sup>a</sup> Zhiyuan Xie,<sup>a</sup> and Lixiang Wang<sup>\*a</sup>

<sup>a</sup> State Key Laboratory of Polymer Physics and Chemistry, Changchun Institute of Applied Chemistry, Chinese Academy of Sciences, Changchun 130022, P. R. China. Fax: 86-431-85684937; Tel: 86-431-85262108; E-mail: [chentonghui@ciac.ac.cn](mailto:chentonghui@ciac.ac.cn); [lixiang@ciac.ac.cn](mailto:lixiang@ciac.ac.cn)

<sup>b</sup> University of the Chinese Academy of Sciences, Beijing 100049, P. R. China.

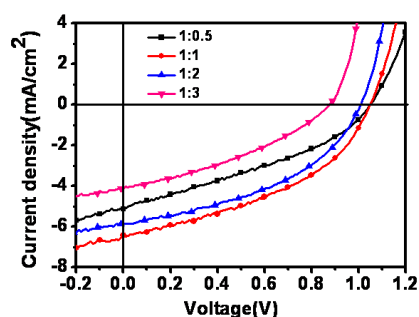

**Figure S1.** *J-V* curves of the devices prepared from Cz-TBT-CAC8/PC<sub>61</sub>BM with different donor/acceptor weight ratios

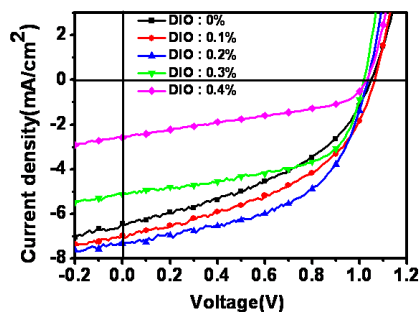

**Fig. S2.** *J-V* curves of the devices prepared from Cz-TBT-CAC8/PC<sub>61</sub>BM (D/A ratio, 1:1) with different content of DIO as additive

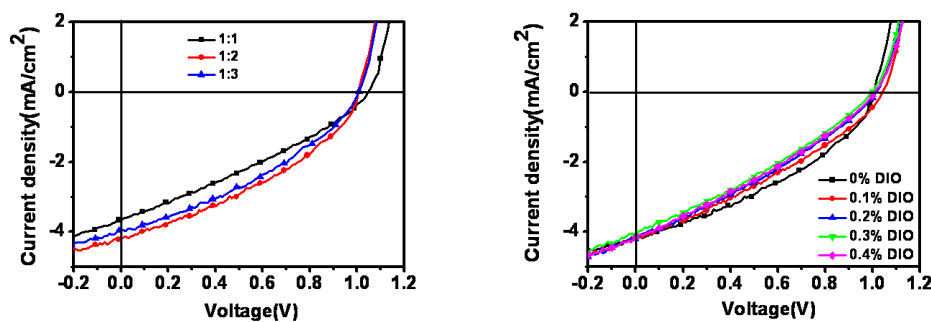

**Fig. S3.** *J-V* curves of the devices prepared from Cz-TBT/PC<sub>61</sub>BM with different D/A ratio (left) and different content of DIO as additive (right) at the optimized D/A ratio (1:2).

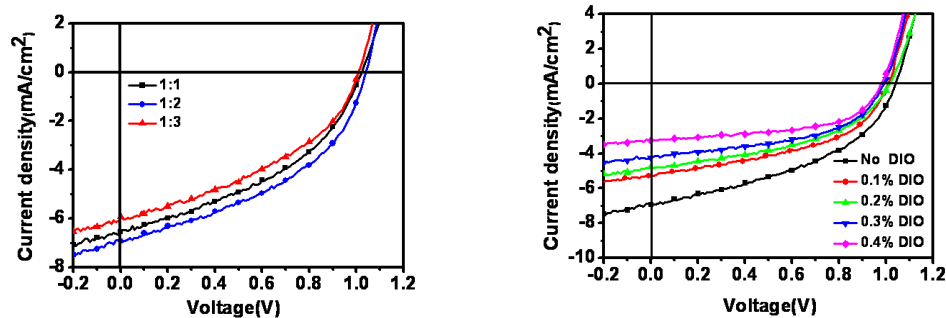

**Fig. S4.** *J-V* curves of the devices prepared from **Cz-TBT-CAC8/PC<sub>71</sub>BM** with different D/A ratio (left) and different content of DIO as additive (right) at the optimized D/A ratio (1:2).

**Table S1** Device performance for BHJ solar cells based on **Cz-TBT-CAC8/PC<sub>71</sub>BM**

| D/A ratio | DIO content | $V_{oc}$ (V) | $J_{sc}$ (mA/cm <sup>2</sup> ) | FF   | PCE   |
|-----------|-------------|--------------|--------------------------------|------|-------|
| 1:1       |             | 1.02         | 6.56                           | 0.42 | 2.80% |
| 1:2       |             | 1.03         | 6.95                           | 0.42 | 3.03% |
| 1:3       |             | 1.01         | 5.92                           | 0.41 | 2.46% |
| 1:2       | 0.1%        | 1.01         | 5.25                           | 0.47 | 2.50% |
| 1:2       | 0.2%        | 1.02         | 4.78                           | 0.45 | 2.21% |
| 1:2       | 0.3%        | 0.99         | 4.24                           | 0.50 | 2.09% |
| 1:2       | 0.4%        | 0.98         | 3.26                           | 0.55 | 1.77% |

The hole mobility of **Cz-TBT-CAC8/PC<sub>61</sub>BM** blends processed from CB and CB-0.2% DIO solvent was measured by the space charge limited current (SCLC) method with a device structure of ITO/PEDOT:PSS/ **Cz-TBT-CAC8:PC<sub>61</sub>BM** (w/w=1:1)/Au.

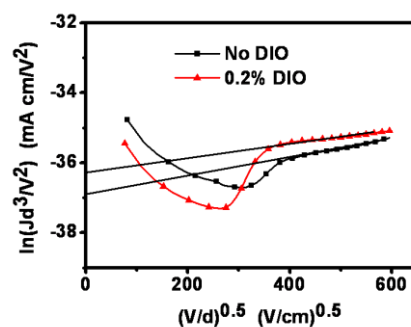

**Fig. S5.** Plot of  $\ln(Jd^3/V^2)$  versus  $(V/d)^{0.5}$  of **Cz-TBT-CAC8/PC<sub>61</sub>BM** (1:1) blends processed from CB and CB-0.2% DIO solvent for the measurement of hole mobility by the SCLC method
